# Supplementary material for: Assessment of DNA/RNA Defend Pro: An Inactivating Sample Collection Buffer for Enhanced Stability, Extraction-Free PCR, and Rapid Antigen Testing of Nasopharyngeal Swab Samples
Source: Preprints.org preprint supplement (doi:10.20944/preprints202403.1361.v1), 2024-03-25
Supplement: Supplementary file 1 [file Table S1.xlsx]

## Sheet: Sheet1
target	forward primer	reverse primer	probe	fluorophore
SARS-CoV-2 E gene10	ACAGGTACGTTAATAGTTAATAGCGT	ATATTGCAGCAGTACGCACACA	ACACTAGCCATCCTTACTGCGCTTCG	FAM
influenza A M gene11	GACCRATCCTGTCACCTCTGAC	AGGGCATTYTGGACAAAKCGTCTA	TGCAGTCCTCGCTCACTGGGCACG	FAM
influenza B HA gene12	AAATACGGTGGATTAAATAAAAGCAA	CCAGCAATAGCTCCGAAGAAA	CACCCATATTGGGCAATTTCCTATGGC	HEX
RSV A N gene13	GCTCTTAGCAAAGTCAAGTTGAATGA	TGCTCCGTTGGATGGTGTATT	ACACTCAACAAAGATCAACTTCTGTCATCCAGC	FAM
RSV B N gene13	GATGGCTCTTAGCAAAGTCAAGTTAA	TGTCAATATTATCTCCTGTACTACGTTGAA	TGATACATTAAATAAGGATCAGCTGCTGTCATCCA	HEX
