# Supplementary material for: Assessment of DNA/RNA Defend Pro: An Inactivating Sample Collection Buffer for Enhanced Stability, Extraction-Free PCR, and Rapid Antigen Testing of Nasopharyngeal Swab Samples
Source: Preprints.org preprint supplement (doi:10.20944/preprints202403.1361.v1), 2024-03-25
Supplement: Supplementary file 2 [file Table S3.xlsx]

## Sheet: Sheet1
sample ID	target	diagnostic result	multiple positive	rapid antigen test	rapid antigen test comment	cobas Liat result	cobas Liat Cq	direct PCR Cq	SD	number of direct PCR replicates positive
23-0026	influenza	positive		+		positive	19.56	29.92	0.55	3
23-0028	SARS-CoV-2	positive		-		positive	33.53			0
23-0030	RSV	positive		+		positive	17.13	24.92	0.33	2
23-0031	RSV	positive		-		positive	24.85	35.57	3.27	3
23-0036	RSV	positive		+	weak	positive	20.66	31.28		1
23-0037	influenza	positive		+		positive	19.73	29.18	0.71	3
23-0038	SARS-CoV-2	positive		+	weak signal	positive	21.54	27.82	0.7	3
23-0039	influenza	positive		-		positive	34.68
23-0040	SARS-CoV-2	positive		+		positive	14.08	20.17	1.55	3
23-0041	RSV	positive		+	very weak	positive	22.06	30.28	0.27	3
23-0042	SARS-CoV-2	positive		+		positive	14.44	24.17	0.11	2
23-0043	SARS-CoV-2	positive		+		positive	16.29	24.57	0.83	3
24-0001	RSV	positive		+		positive	20.98	29.11	0.41	3
24-0003	influenza	positive		+	weak	positive	22.62	31.55	0.28	3
24-0005	RSV	positive		-		positive	32.98	38.91	NA	1
24-0007	SARS-CoV-2	positive		-		positive	23.89	31.46	0.54	3
24-0008	SARS-CoV-2	negative
24-0009	RSV	positive		-		positive	32.32			1
24-0011	RSV	positive		-		negative
24-0013	RSV	positive		+	very weak	positive	22.45	30.37		1
24-0015	influenza	positive		-		positive	29.41	36.64		1
24-0017	influenza	positive		-		positive	32.78
24-0019	RSV	positive		+		positive	19	29.71	0.69	3
24-0021	RSV	positive		+		positive	20.92	34.84	0.7	3
24-0023	influenza	positive		-		positive	24.54	38.46		1
24-0025	influenza	positive		-		positive	24.53	35.34	0.32	3
24-0027	SARS-CoV-2	positive		+		positive	17.45	29.71	0.2	3
24-0028	SARS-CoV-2	negative
24-0029	RSV	positive		-		positive	22.59	31.43	0.19	3
24-0031	RSV	positive		-		negative
24-0033	RSV	positive		-		positive	23.53	33.3	1.03	3
24-0035	influenza	positive		-		positive	30.48	37.08		1
24-0037	SARS-CoV-2	positive		-		positive	35.3
24-0039	RSV	positive		-		positive	34.3
24-0041	influenza	positive		-		negative
24-0043	influenza	positive		+		positive	16.13	27.63	0.87	3
24-0045	influenza	positive		-		positive	27.66	37.03	0.81	2
24-0047	SARS-CoV-2	positive		-		positive	26.78	33.99	0.74	3
24-0049	RSV	positive		+	very weak	positive	17.74	23.65	1.6	2
24-0051	influenza	positive		+	weak	positive	20.99	33.34	0.31	3
24-0056	SARS-CoV-2	positive		+		positive	16.16	25.59	1.01	3
24-0057	SARS-CoV-2	positive	yes	+		positive	12.42	22.11	1.03	3
24-0057	influenza	positive	yes	-		negative
24-0058	SARS-CoV-2	positive		+		positive	19.67	26.02	0.91	3
24-0059	influenza	positive		-		positive	22.09	35.29	0.66	3
24-0060	influenza	positive		-		positive	22.94	32.99	1.58	3
24-0061	influenza	positive		-		positive	22.45	33.16	2.92	3
24-0062	influenza	positive		+	weak	positive	20.53	30.95	0.5	3
24-0063	SARS-CoV-2	positive		+		positive	20.2	26.46	0.39	3
24-0064	influenza	positive		-		positive	23.31	31.82	0.31	3
24-0065	influenza	positive		-		positive	21.42	31.7	0.53	3
24-0066	influenza	positive		+		positive	18.21	29.23	1.11	3
24-0067	influenza	positive		+		positive	20.49	27.06	1.21	3
24-0068	SARS-CoV-2	positive		+		positive	18.11	26.12	0.11	3
24-0069	influenza	positive		+		positive	22.58	33.49	0.63	3
24-0070	influenza	positive		-		positive	35.04
24-0071	influenza	positive		-		positive	33.38
24-0072	SARS-CoV-2	positive	yes	-		positive	31.19	34.67		1
24-0072	RSV	positive	yes	-		positive	25.42	32.9	1.04	3
24-0072	influenza	positive	yes	-		positive	32.17
24-0073	SARS-CoV-2	positive		+		positive	14.46	21.55	0.65	3
24-0074	SARS-CoV-2	positive		+		positive	13.77	20.87	0.72	3
24-0075	SARS-CoV-2	positive	yes	-		negative
24-0075	influenza	positive	yes	-		positive	27.35
24-0076	SARS-CoV-2	positive	yes	-		negative
24-0076	influenza	positive	yes	+		positive	19.47	28.5	0.52	3
24-0083	SARS-CoV-2	positive		+		positive	15.64	22.77	0.61	3
24-0084	influenza	positive		-		positive	30.75	37.34		1
24-0085	SARS-CoV-2	positive		+		positive	15.08	22.82	1.07	3
24-0086	influenza	positive		-		positive	24.41	34.47	0.38	3
24-0087	influenza	positive		-		positive	22.17	34.75	1.57	2
24-0088	influenza	positive		+		positive	20.11	28.64	0.81	3
24-0089	influenza	positive		-		positive	20.38	29.75	0.74	3
24-0090	SARS-CoV-2	positive		-		positive	34.11
24-0091	influenza	positive		-		positive	26.9	36.55	0.88	3
24-0092	SARS-CoV-2	positive	yes	-		negative		30.89		1
24-0092	influenza	positive	yes	+	weak	positive	18.78	28.12	0.1	3
24-0093	influenza	positive		-		positive	28.05	37.91	0.93	2
24-0094	influenza	positive		-		positive	31.34	37.86		1
24-0095	influenza	positive		-		positive	21.61	29.49	0.15	3
24-0096	influenza	positive		-		positive	27.7	37.91	1.96	3
24-0097	SARS-CoV-2	positive		+		positive	16.74	25.58	1.32	3
24-0098	influenza	positive		-		positive	28.74
24-0099	influenza	positive		-		positive	20.79	28.09	0.7	3
24-0100	influenza	positive		-		positive	27.95	36.41	0.48	2
24-0101	SARS-CoV-2	positive		-		positive	34.15
24-0102	influenza	positive		-		positive	26.47	35.12	0.68	3
24-0103	influenza	positive		-		positive	26.01	34.74	0.48	3
24-0104	influenza	positive		+		positive	20.76	31.25	1.71	3
24-0105	influenza	positive		+		positive	20.14	29.71	0.43	3
24-0106	influenza	positive		-		positive	30.52
24-0107	SARS-CoV-2	positive	yes	-		positive	29.88
24-0107	influenza	positive	yes	+		positive	15.29	25.33	0.55	3
24-0108	influenza	positive		+	very weak	positive	23.65	33.57	0.25	3
24-0109	influenza	positive		+	weak	positive	21.18	30.64	0.59	3
24-0110	SARS-CoV-2	positive		-		positive	31.8
24-0111	influenza	positive		-		positive	35.29
